# Supplementary material
Source: Springer Nature journal article supplement (https://www.springermedizin.de/resource/supplementary/12874_2011_651_MOESM3_ESM.pdf/9432320)

$a=1, q=4$

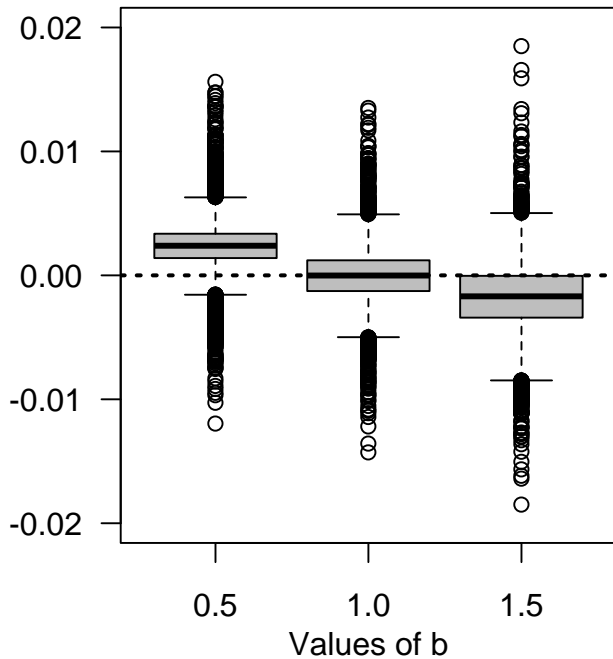

$a=1, q=13$

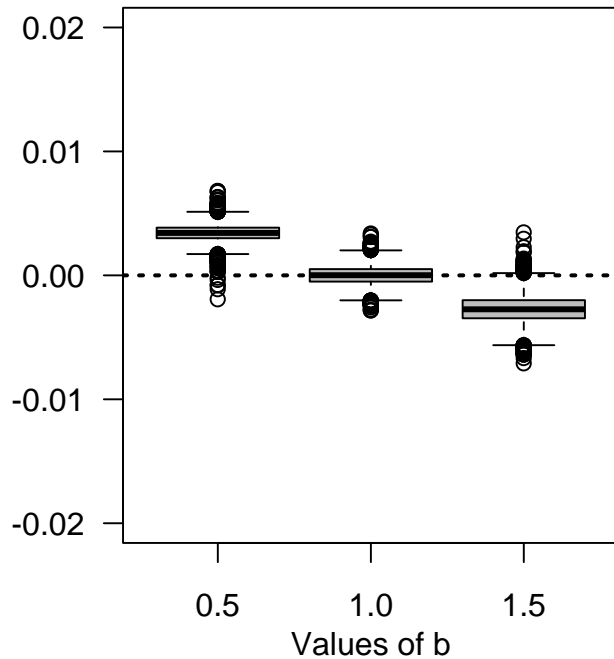

Supplement: MOESM3 [file 9432320]
